# Supplementary material
Source: Springer Nature journal article supplement (https://www.springermedizin.de/resource/supplementary/12888_2010_778_MOESM2_ESM.pdf/9478720)
Supplement: MOESM2 [file 9478720]

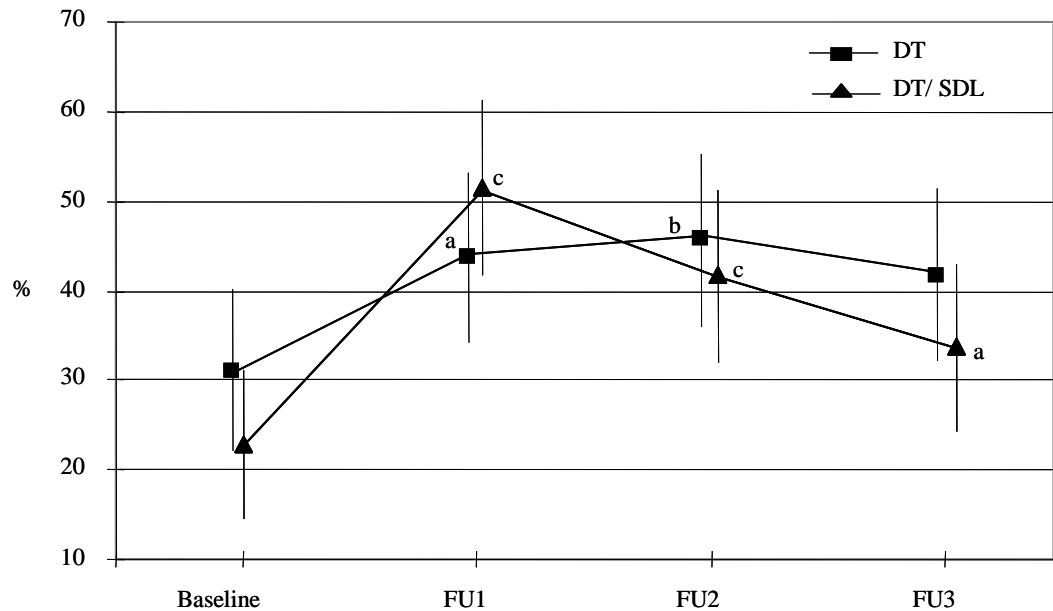

<sup>a</sup>  $P < 0.05$  compared with baseline

<sup>b</sup>  $P < 0.01$  compared with baseline

<sup>c</sup>  $P < 0.001$  compared with baseline

Note: the error bars represent 95% confidence intervals
